Articles of interest in other COB journals

From *Journal of Cell Science*

**Snail is required for TGF $\beta$ -induced endothelial-mesenchymal transition of embryonic stem cell-derived endothelial cells**

Takashi Kokudo, Yuka Suzuki, Yasuhiro Yoshimatsu, Tomoko Yamazaki, Tetsuro Watabe and Kohei Miyazono

Kokudo, T. et al. 2008. *J. Cell Sci.* doi: 10.1242/jcs.028282

**$\alpha$ II- $\beta$ V spectrin bridges the plasma membrane and cortical lattice in the lateral wall of the auditory outer hair cells**

Kirian Legendre, Saaid Safieddine, Polonca Küssel-Andermann, Christine Petit and Aziz El-Amraoui

Legendre, K. et al. 2008. *J. Cell Sci.* doi: 10.1242/jcs.028134
